# Supplementary material for: Machine-learning media bias
Source: PLOS journal article supplement (doi:10.1371/journal.pone.0271947), 2022-08-10
Supplement: S1 (10.1371/journal.pone.0271947.s001) [file journal.pone.0271947.s001]

# S1 Appendix: Supporting Information

In this section, we include supplementary technical details in the form of additional generalized eigenvalue plots and topic relevance weights. Underlying data can be found at the following link: <https://space.mit.edu/home/tegmark/phrasebias.html>

Figure S 1. Affirmative action bias

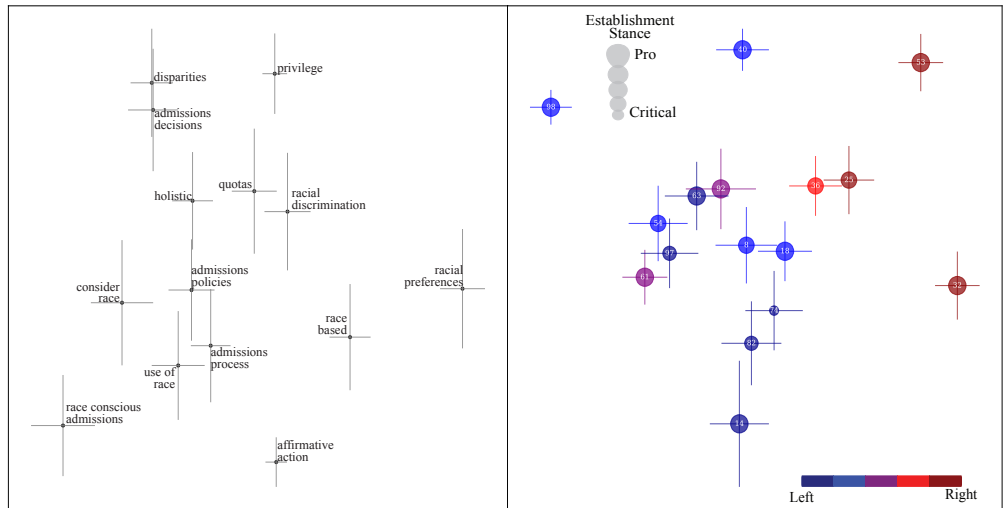

Figure S 2. Palestine bias

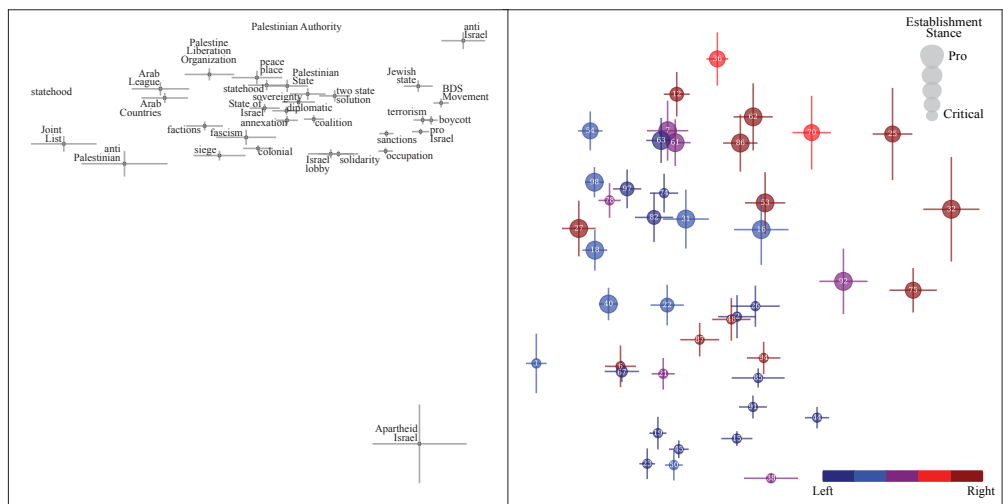

Figure S 3. Public finance bias

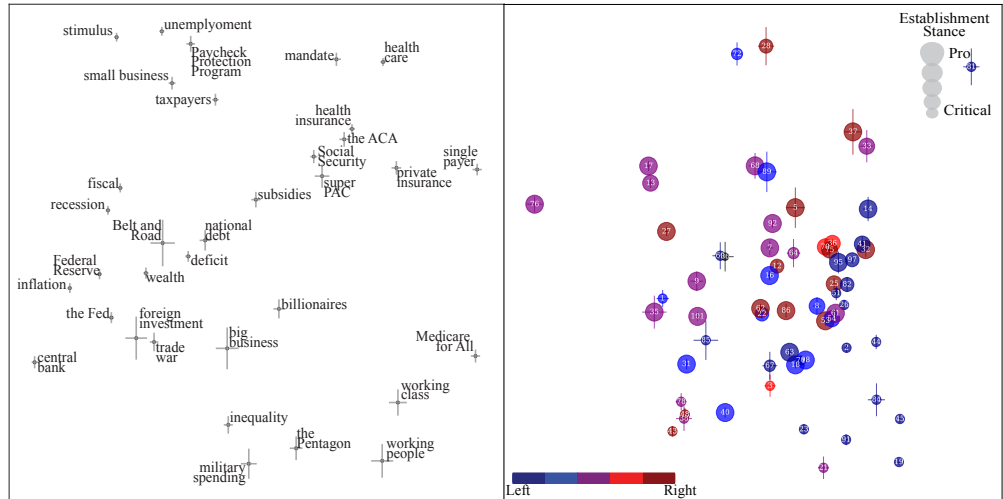

Figure S 4. Human rights bias

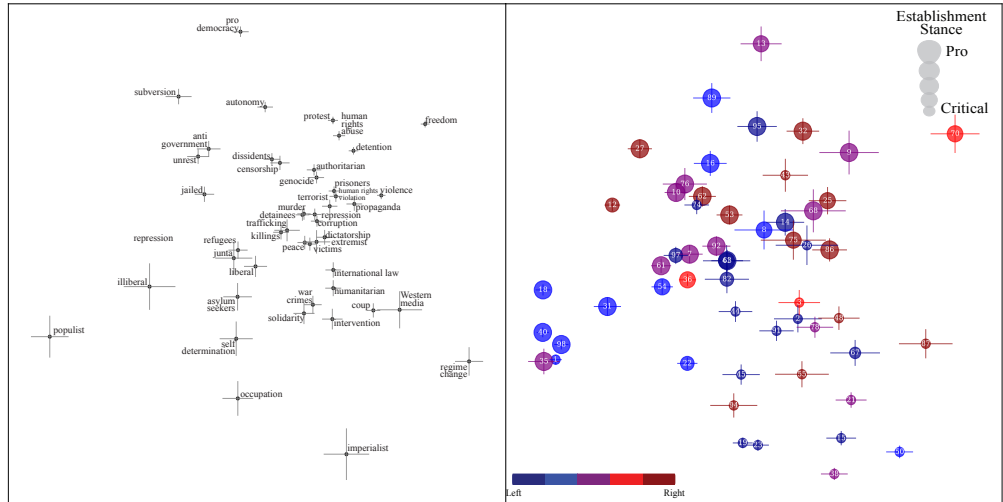

Figure S 5. Israel bias

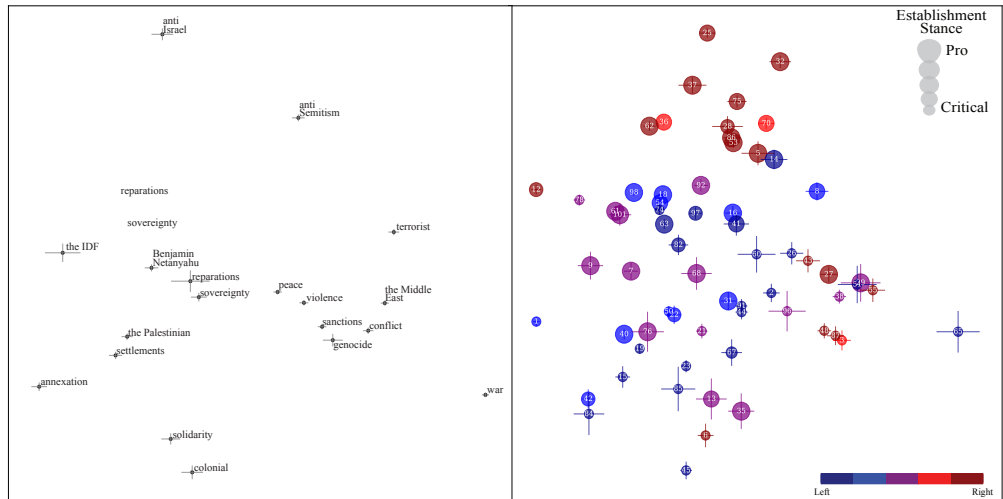

Figure S 6. Private finance bias

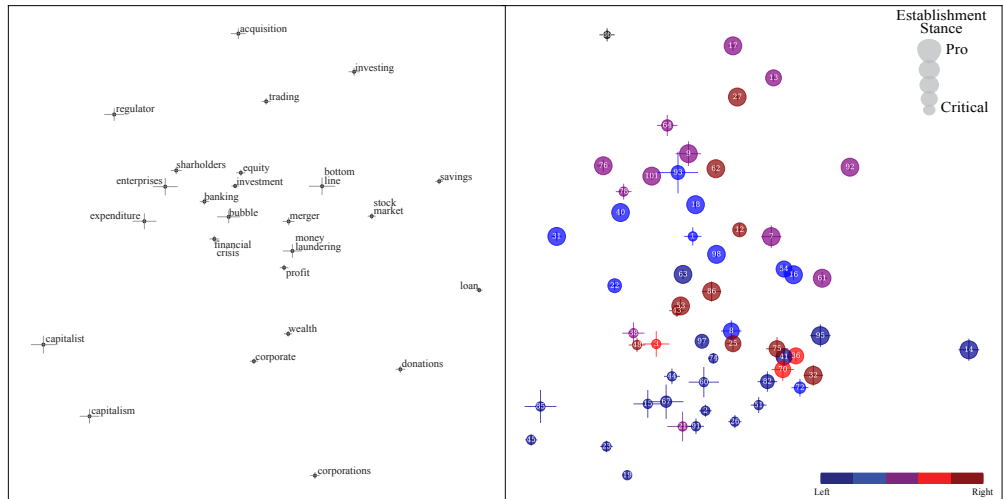

Figure S 7. Native Americans bias

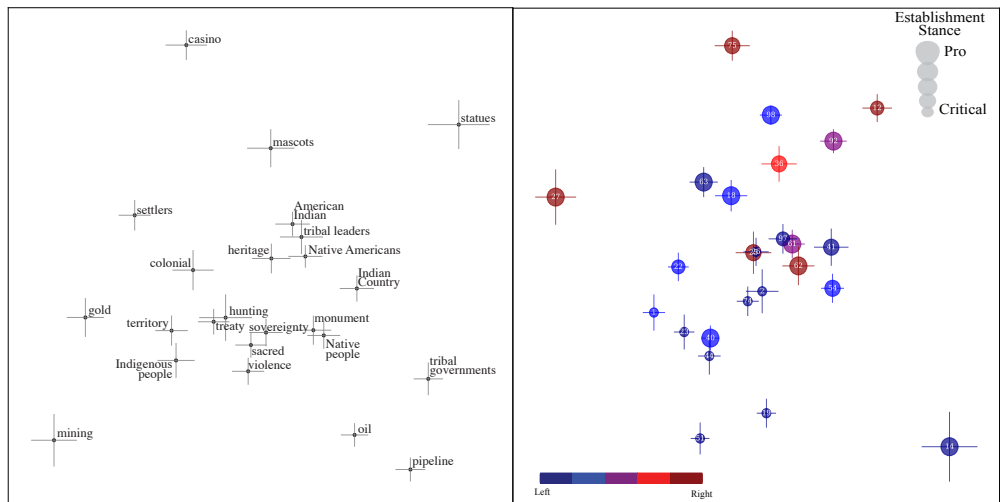

Figure S 8. Oil bias

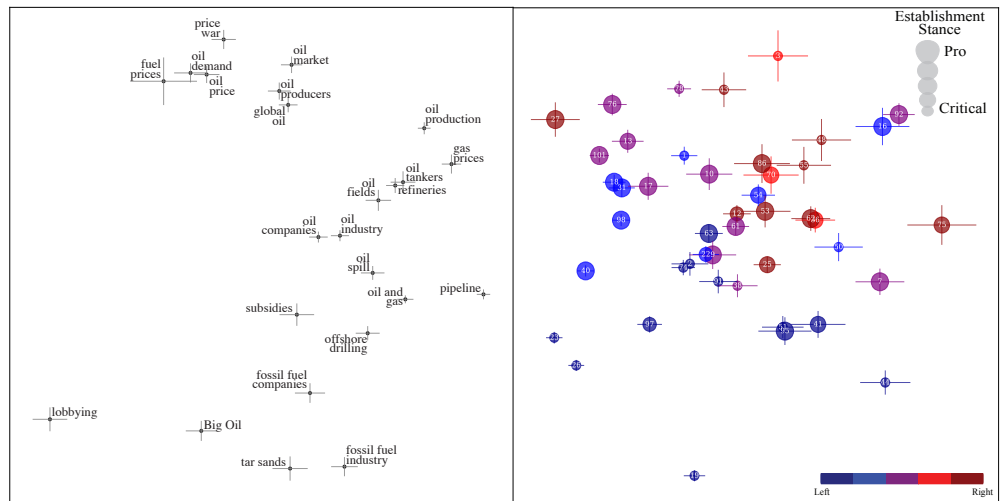

Figure S 9. Prisons bias

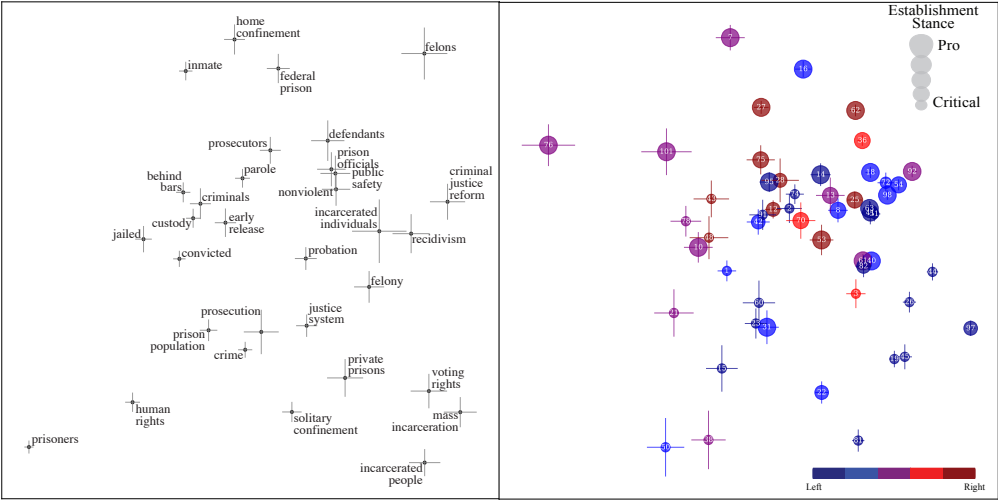

**Table S 1. Topic relevance weights for the left-right and establishment topic clusters**

| Topic Component      | Left-Right Weight | Topic Component      | Establishment weight |
|----------------------|-------------------|----------------------|----------------------|
| affirmative action 1 | 0.271             | Venezuela 2          | 0.265                |
| BLM 1                | 0.245             | military spending 2  | 0.263                |
| Palestine 1          | 0.235             | Palestine 2          | 0.257                |
| guns 1               | 0.233             | Yemen 2              | 0.235                |
| tech censorship 1    | 0.230             | police 2             | 0.228                |
| Venezuela 1          | 0.226             | prisons 2            | 0.218                |
| abortion 1           | 0.224             | private finance 2    | 0.216                |
| Russia 1             | 0.202             | nuclear weapons 2    | 0.215                |
| Yemen 1              | 0.200             | Native Americans 2   | 0.194                |
| human rights 1       | 0.200             | human rights 2       | 0.188                |
| climate change 1     | 0.184             | China 2              | 0.187                |
| sexual harassment 1  | 0.181             | Russia 2             | 0.180                |
| US immigration 1     | 0.170             | nuclear weapons 1    | 0.178                |
| church state 1       | 0.166             | Israel 2             | 0.173                |
| police 1             | 0.163             | espionage 2          | 0.153                |
| church state 2       | 0.160             | Islam 2              | 0.152                |
| Judaism 1            | 0.160             | espionage 1          | 0.148                |
| Israel 1             | 0.158             | public finance 2     | 0.145                |
| universities 1       | 0.151             | Islam 1              | 0.136                |
| Judaism 2            | 0.151             | private finance 1    | 0.135                |
| oil 1                | 0.128             | BLM 2                | 0.133                |
| tech censorship 2    | 0.117             | oil 2                | 0.132                |
| climate change 2     | 0.117             | US immigration 2     | 0.130                |
| universities 2       | 0.094             | guns 2               | 0.090                |
| public finance 1     | 0.074             | abortion 2           | 0.088                |
|                      |                   | China 1              | 0.083                |
|                      |                   | affirmative action 2 | 0.066                |
|                      |                   | sexual harassment 2  | 0.054                |
|                      |                   | Native Americans 1   | 0.053                |
|                      |                   | prisons 1            | 0.049                |
|                      |                   | military spending 1  | 0.048                |

When we performed the generalized singular value decompositions for each topic, we had the freedom to choose both the sign of each plotted component and whether we numbered it 1 or 2. To eliminate these ambiguities and standardize the components, we the automatically flip signs such that all topics  $k$  in Cluster 1 have  $E_{1k} > 0$  and all topics in Cluster 2 have  $E_{2k} > 0$ , and numbered the two components as follows. The two components each have a relevance weight as shown in the Table [1](#); the one with the largest relevance weight is numbered “1” if it is a left-right component and “2” otherwise; the second component gets the opposite number.
